# Supplementary material for: A live measles-vectored COVID-19 vaccine induces strong immunity and protection from SARS-CoV-2 challenge in mice and hamsters
Source: PubMed Central journal article supplement (PMC8560864; doi:10.1038/s41467-021-26506-2), 2021-11-01
Supplement: 41467_2021_26506_MOESM1_ESM.pdf [file 41467_2021_26506_MOESM1_ESM.pdf]

## Supplementary information

### A live measles-vectored COVID-19 vaccine induces strong immunity and protection from SARS-CoV-2 challenge in mice and hamsters.

Phanramphoei N. Frantz<sup>1,2</sup>, Aleksandr Barinov<sup>1,3</sup>, Claude Ruffié<sup>1</sup>, Chantal Combredet<sup>1</sup>, Valérie Najburg<sup>1</sup>, Guilherme Dias de Melo<sup>4</sup>, Florence Larrous<sup>4</sup>, Lauriane Kergoat<sup>4</sup>, Samaporn Teeravechyan<sup>2</sup>, Anan Jongkaewwattana<sup>2</sup>, Emmanuelle Billon-Denis<sup>5</sup>, Jean-Nicolas Tournier<sup>5</sup>, Matthieu Prot<sup>6</sup>, Laurine Levillayer<sup>6</sup>, Laurine Conquet<sup>7</sup>, Xavier Montagutelli<sup>7</sup>, Magali Tichit<sup>8</sup>, David Hardy<sup>8</sup>, Priyanka Fernandes<sup>9</sup>, Hélène Strick-Marchand<sup>9</sup>, James Di Santo<sup>9</sup>, Etienne Simon-Lorière<sup>6</sup>, Hervé Bourhy<sup>4</sup>, and Frédéric Tangy<sup>1,†</sup>

<sup>1</sup> Institut Pasteur, Université de Paris, Innovation Lab: Vaccines, Paris, France

<sup>2</sup> National Center for Genetic Engineering and Biotechnology (BIOTEC), National Science and Technology Development Agency, Virology and Cell Technology Laboratory, Pathumthani, Thailand

<sup>3</sup> Viroxis, Paris, France

<sup>4</sup> Institut Pasteur, Université de Paris, Lyssavirus Epidemiology and Neuropathology Unit, Paris, France

<sup>5</sup> Armed Forces Biomedical Research Institute (IRBA), Microbiology and infectious diseases department, Brétigny-sur-Orge, France

<sup>6</sup> Institut Pasteur, Université de Paris, Evolutionary Genomics of RNA viruses unit, Paris, France

<sup>7</sup> Institut Pasteur, Université de Paris, Laboratory of Mouse Genetics, Paris, France

<sup>8</sup> Institut Pasteur, Université de Paris, Experimental Neuropathology unit, Paris, France

<sup>9</sup> Institut Pasteur, Université de Paris, INSERM U1223, Innate Immunity unit, Paris, France

<sup>†</sup> Corresponding author: Frédéric Tangy

Email: [frederic.tangy@pasteur.fr](mailto:frederic.tangy@pasteur.fr)

# SFig. 1

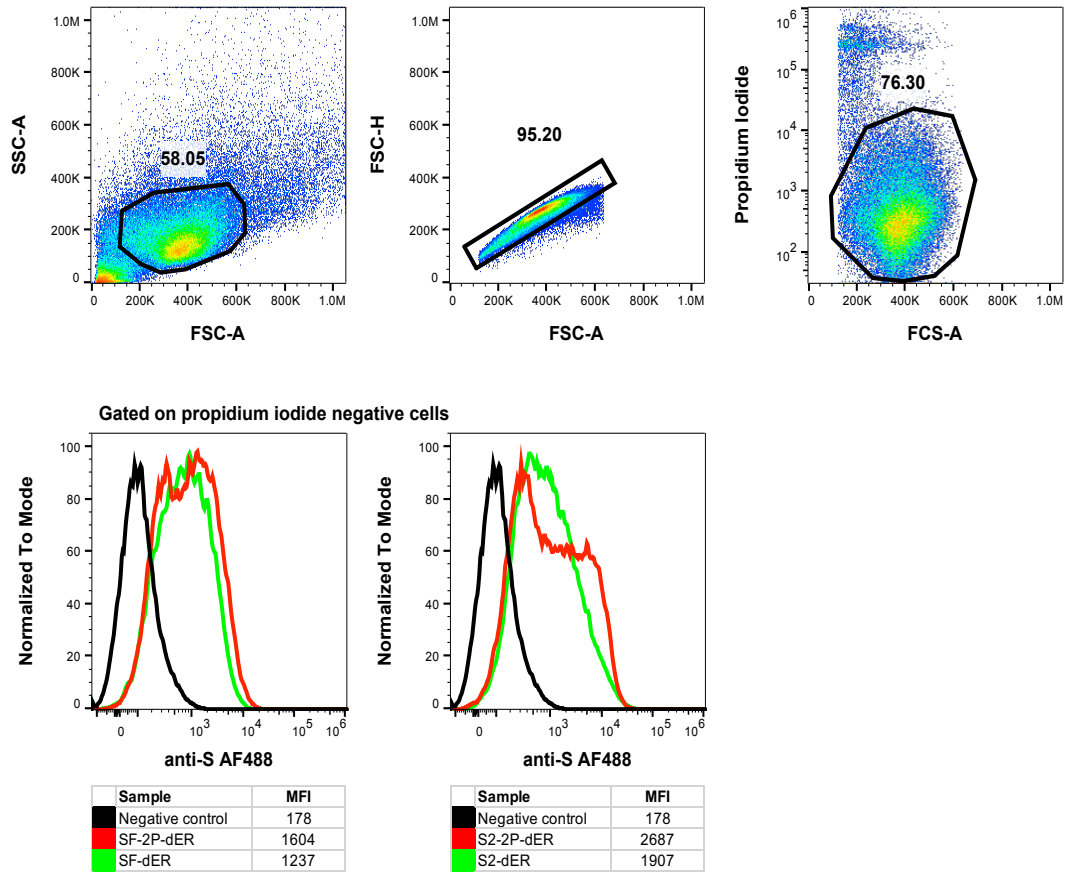

**Supplementary figure 1.** Expression of SARS-CoV-2 S antigens on the surface of transfected HEK293T cells. Cells transfected with pcDNA expression vectors encoding full-length S or S2 subunit antigens were stained for indirect immunofluorescence with an anti-S antibody followed by Alexa Fluor 488-conjugated goat anti-rabbit IgG. Propidium iodide was used to exclude dead cells by gating (upper dot plots). Histograms show surface expression of full-length S (left histograms) or S2 subunit proteins (right histograms). Native-conformation S antigens (green), prefusion-stabilized S (red), mock-transfected control cells (black histograms) and corresponding mean fluorescence intensities (MFI) are shown. The experiment shown was conducted using two biologically independent batches.

## SFig. 2

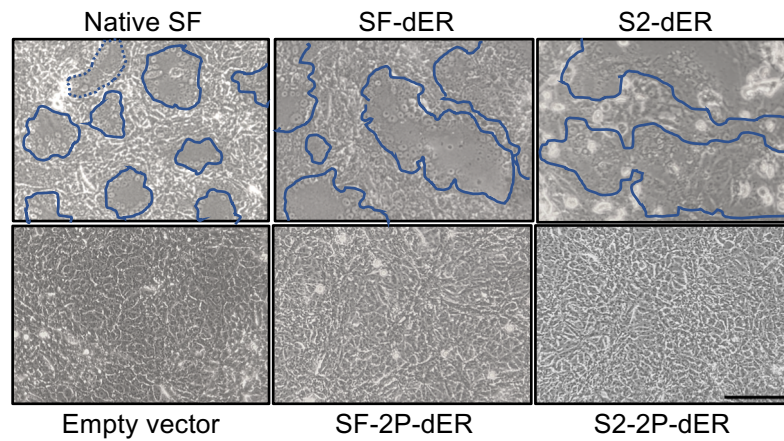

**Supplementary figure 2.** S protein-mediated syncytium formation in transfected Vero cells. Images of Vero cells transfected with pcDNA expression vectors encoding SARS-CoV-2 S proteins were acquired 24 hours post-transfection. Upper images show Vero cells transfected with plasmids encoding native-conformation S antigens, while lower images depict cells transfected with prefusion-stabilized S antigens and non-transfected control Vero cells. Blue lines delineate the borders of syncytia. Native SF indicates native-conformation full-length S protein with an intact CT. Microscope was used at 10x magnification (scale bar, 100  $\mu\text{m}$ ). The experiment shown was conducted using two biologically independent Vero cell batches.

**SFig. 3**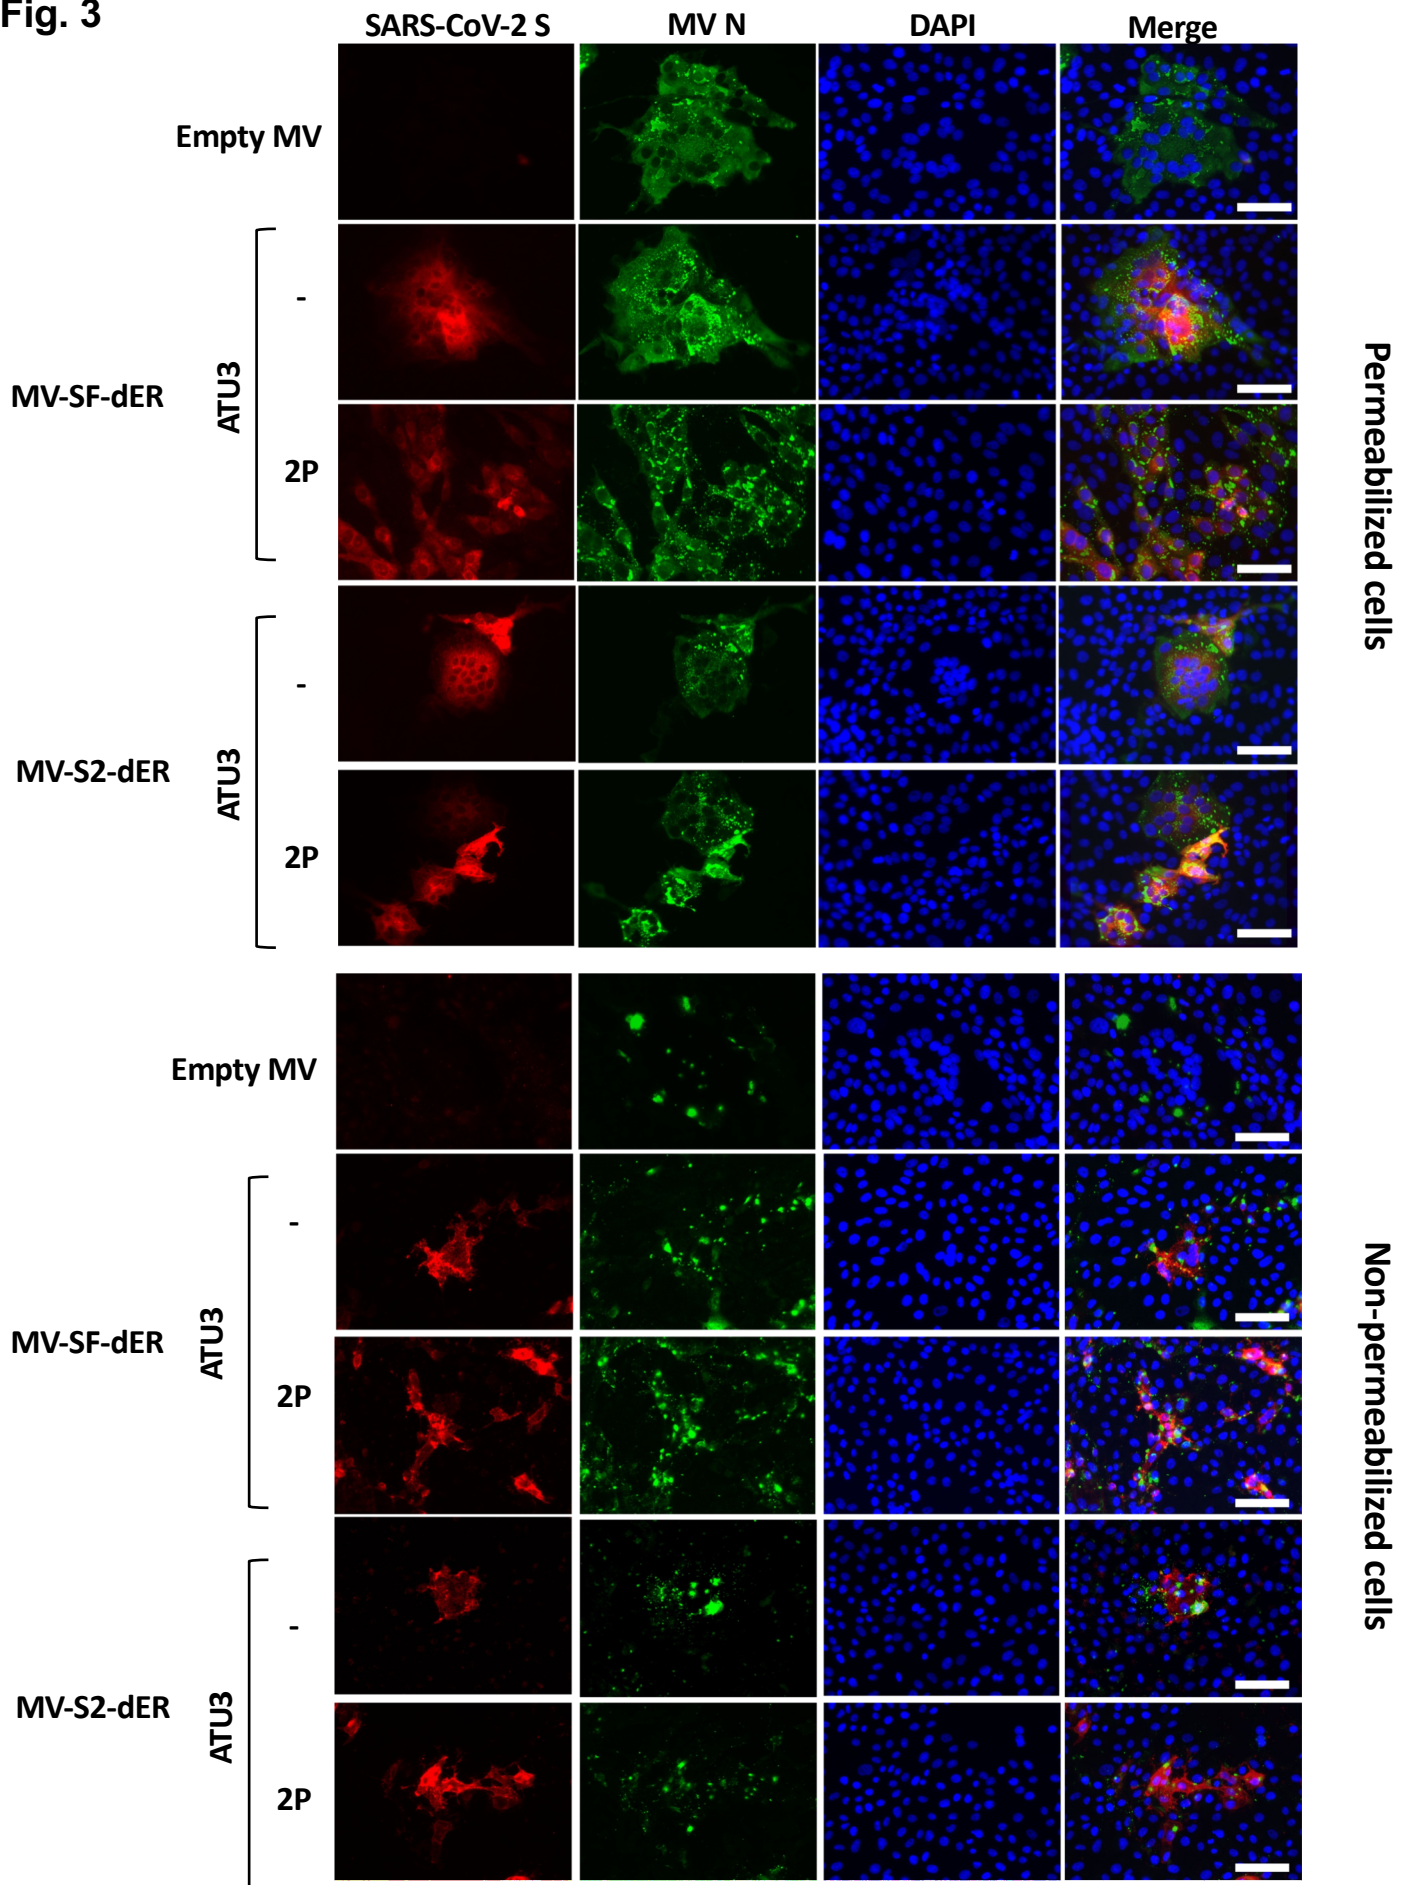

**Supplementary figure 3.** Immunofluorescence analysis of intracellular S protein expression in Vero cells infected with recombinant MV vaccines. Vero cells were infected with rMVs expressing SARS-CoV-2 S proteins or empty MV Schwarz. Twenty-four hours after infection, S protein was detected in saponin-permeabilized cells or non-saponin treated cells using a mouse anti-S antibody followed by Cy3-conjugated goat anti-mouse IgG (red). MV N protein was visualized using rabbit polyclonal anti-N antibody followed by Alexa Fluor 488-conjugated goat anti-rabbit IgG (green). Nuclei were stained with DAPI (blue). Images were acquired using a fluorescence microscope at 20x magnification (scale bar, 50  $\mu$ m) The experiment shown was conducted using two or three biologically independent Vero cells batches.



# SFig. 4

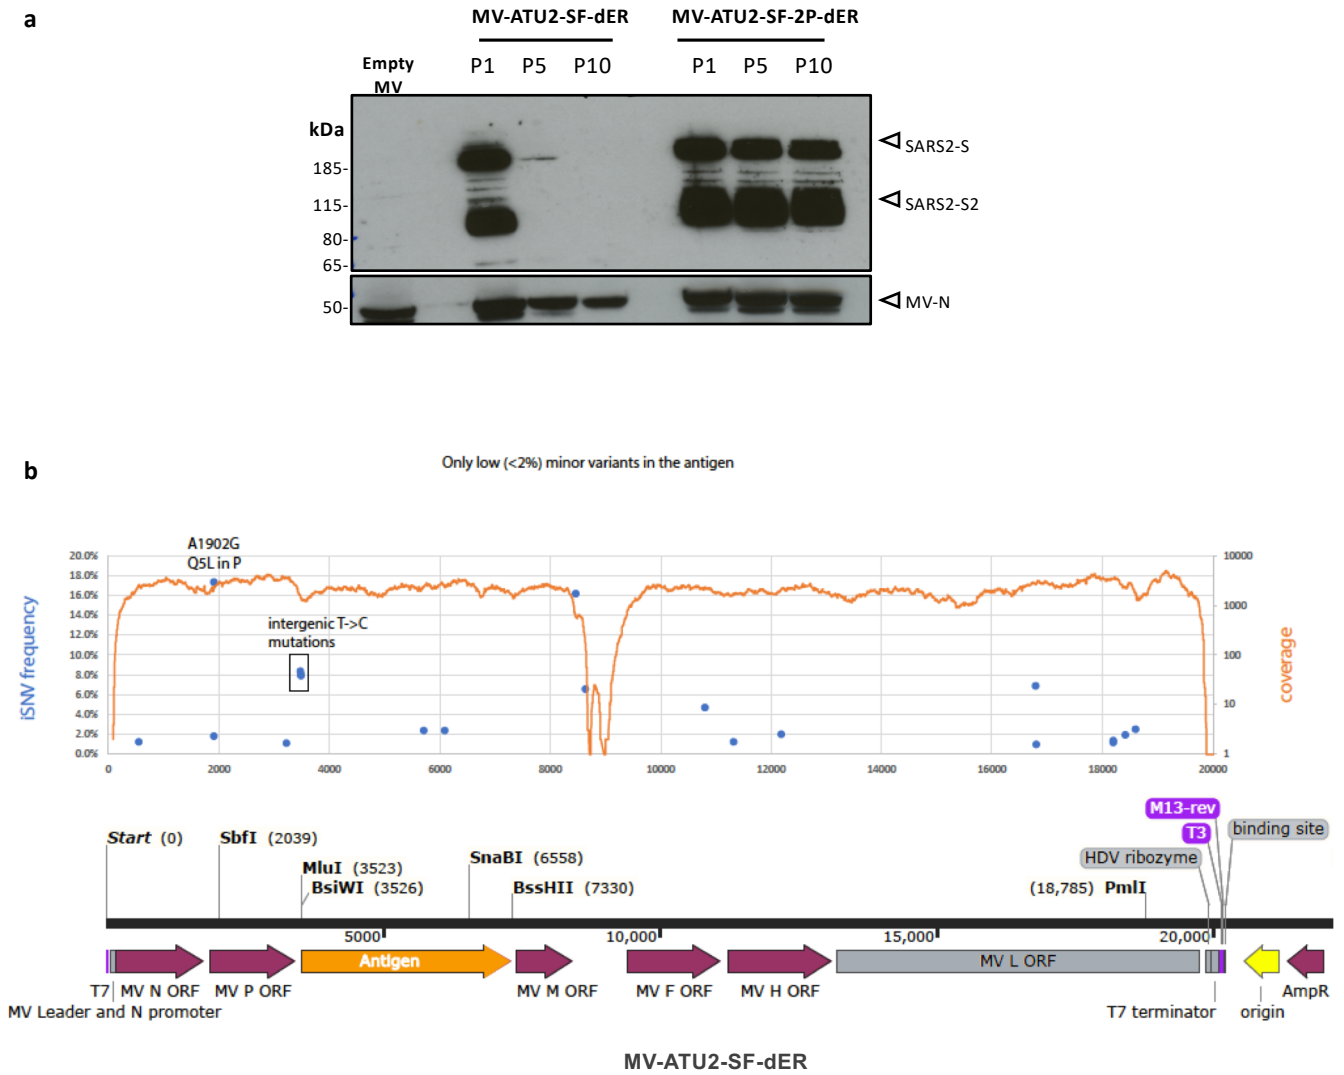

**Supplementary figure 4.** The genetic stability of recombinant MV vaccines from serial passages; **a)** The Western blot analysis of S protein expression in Vero cells infected with recombinant MV vaccines from serial passages. MV ATU2 vaccines expressing SF-dER or SF-2P-dER antigens were serially passaged on Vero cells from P1 up to P10 and S protein expression was determined by immunoblotting of P1, P5, and P10 cell lysates. Vero cells infected with empty MV were examined in parallel and served as negative controls. **b)** Genome coverage of MV-ATU2-SF-dER (P4) from Next-Generation Sequencing. The experiments shown were conducted using two or three biologically independent Vero cell batches.

# SFig. 5

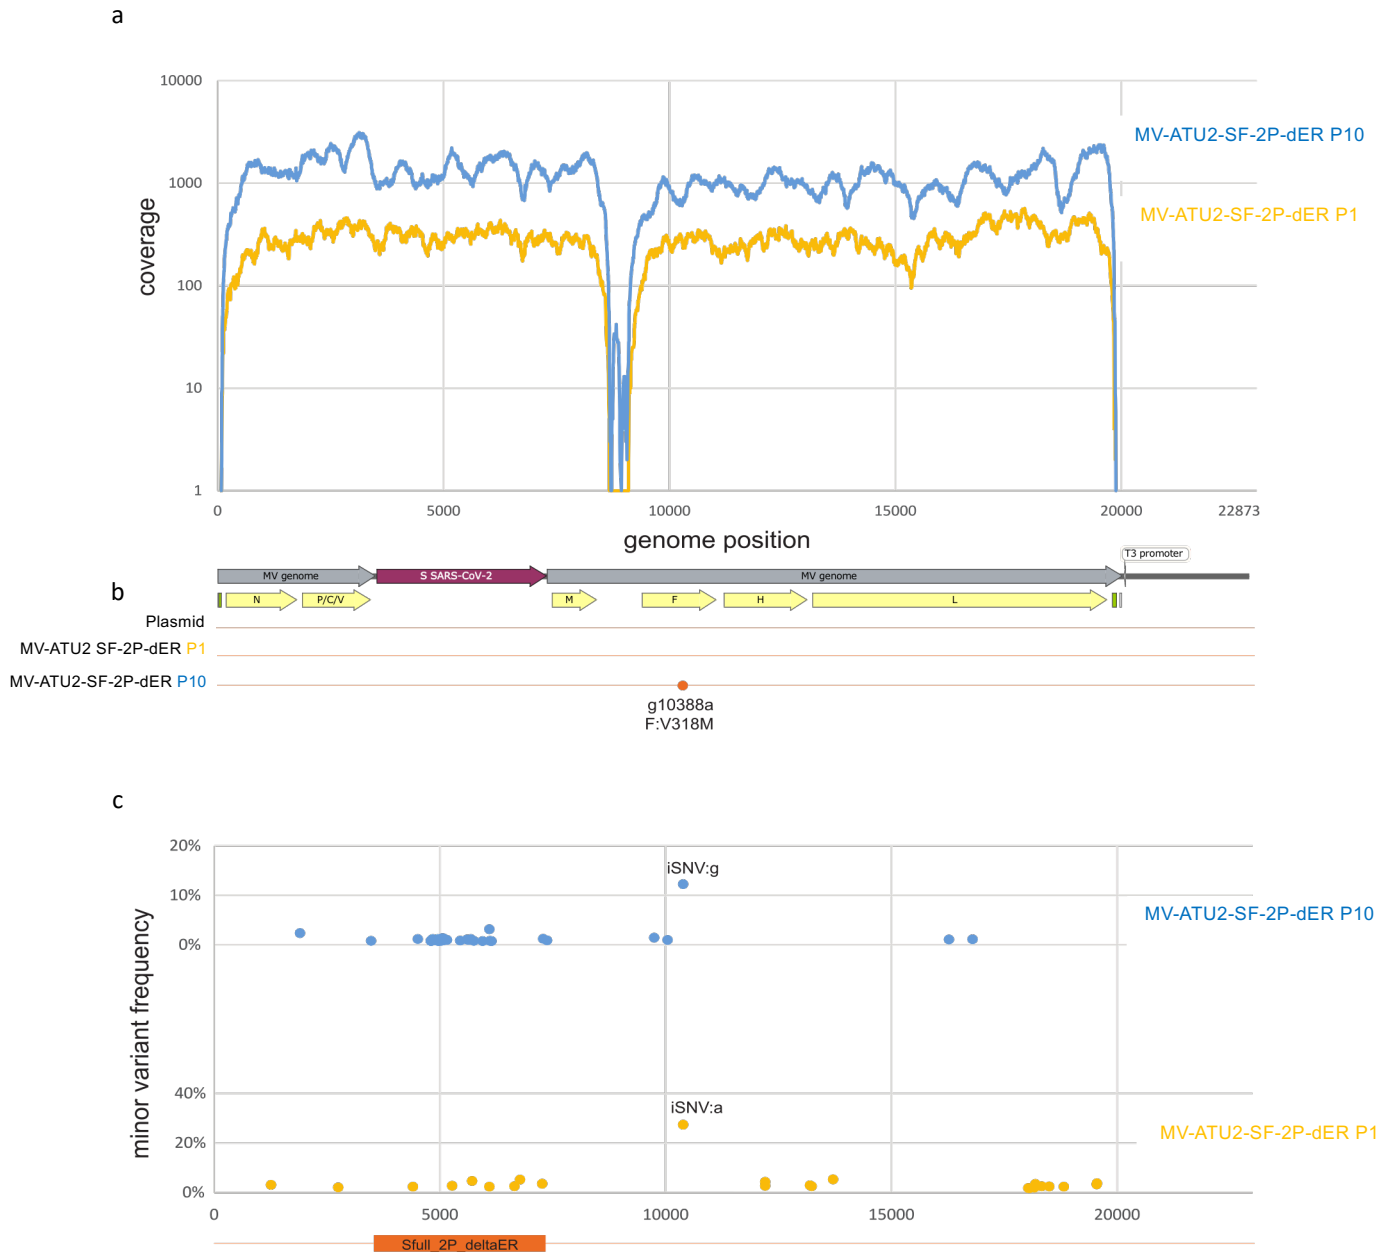

**Supplementary figure 5.** Genome coverage of MV-ATU2-SF-2P-dER from Next-Generation Sequencing depicted in; **a)** Schematic of genome coverage to with the genome position with yellow and blue lines represent MV-ATU2-SF-2P-dER genome sequencing of P1 and P10, respectively. **b)** Schematic of sequence comparison of plasmid to MV-ATU2-SF-2P-dER genome sequencing of P1 and P10. **c)** Percent minor variant frequency with yellow and blue dots represent MV-ATU2-SF-2P-dER genome of P1 and P10.

**SFig. 6**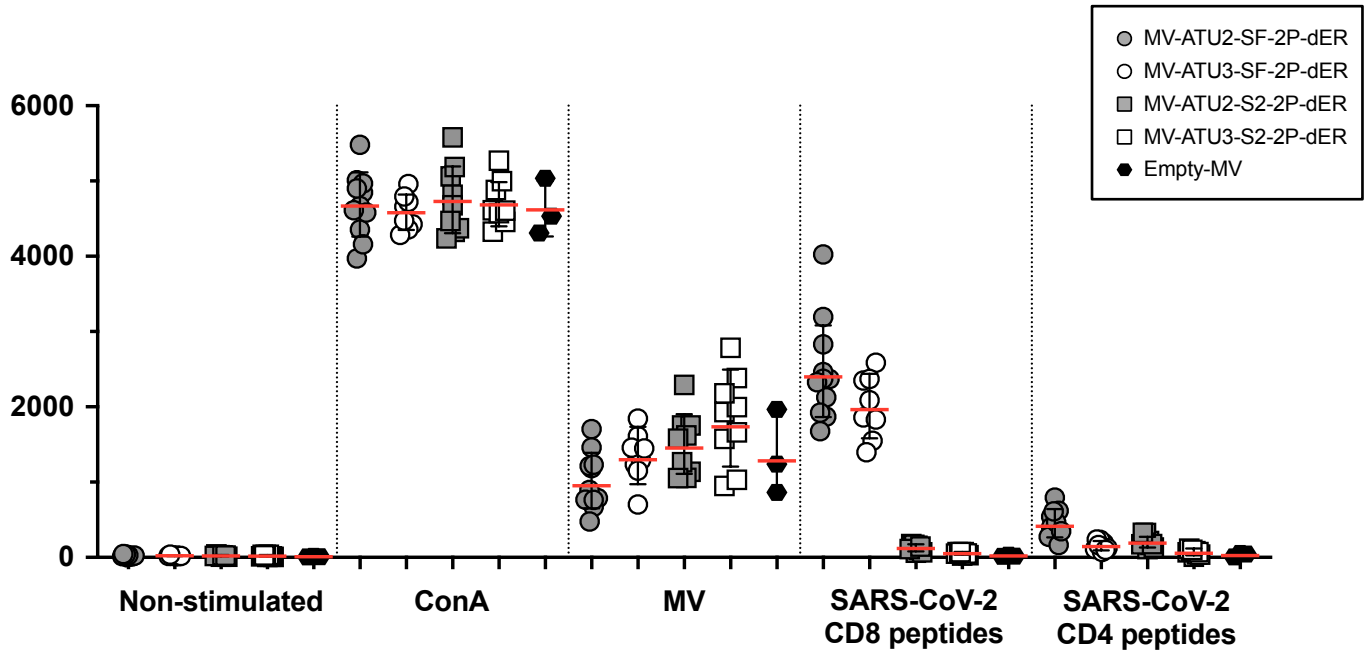

**Supplementary figure 6.** IFN- $\gamma$  ELISPOT analysis of T cell responses elicited in IFNAR<sup>-/-</sup> mice immunized with rMV SARS-CoV-2 vaccine candidates. Groups of mice were immunized with MV-ATU2-SF-2P-dER, n=11; MV-ATU3-SF-2P-dER, n=8; MV-ATU2-S2-2P-dER, n=9; MV-ATU3-S2-2P-dER, n=9 and Empty MV, n=3. Splenocytes of vaccinated mice were stimulated *ex vivo* with a pool of synthetic peptides covering the predicted CD8<sup>+</sup> and CD4<sup>+</sup> T-cell epitopes of the SARS-CoV-2 S protein (Supplementary Table1). Splenocytes were also stimulated with an empty MV virus to detect MV vector-specific T-cell responses, concanavalin A for positive controls or were left unstimulated (negative controls). The number of IFN- $\gamma$  secreting cells per 1 $\times$ 10<sup>6</sup> splenocytes in individual animals are shown. Data are presented as geometric mean with lines and error bars indicating  $\pm$  geometric SD.

# SFig. 7

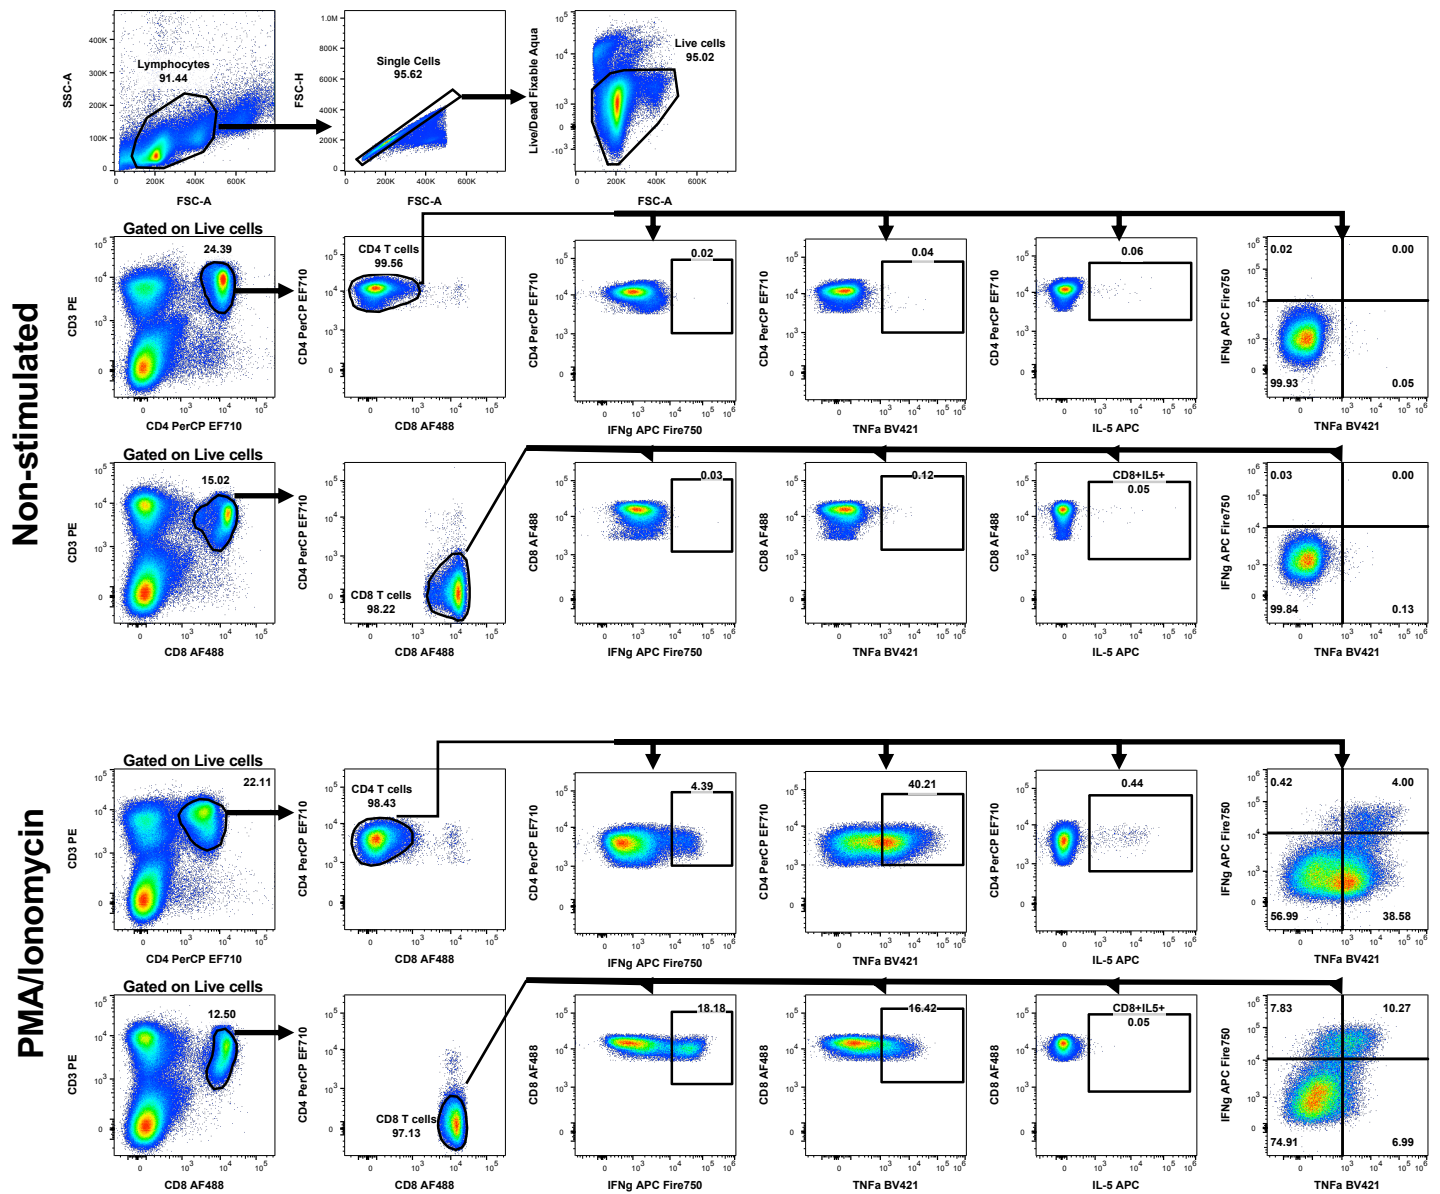

**Supplementary figure 7.** Gating strategy for intracellular cytokine staining. An exemplary depiction of the gating strategy to analyze IFN- $\gamma$ , TNF- $\alpha$  and IL-5 T cell responses in non-stimulated or PMA/Ionomycin stimulated (positive controls) mouse splenocytes. Live/Dead Fixable Aqua Viability Dye was used to exclude dead cells by gating (top plots). For each stimulation group, the first two FACS plots on the left depict gating of CD4<sup>+</sup> (upper plots in each group) and CD8<sup>+</sup> T cells (lower plots). CD4<sup>+</sup> and CD8<sup>+</sup> T cells from each group were analyzed for the expression of IFN- $\gamma$ , TNF- $\alpha$  and IL-5 (from the left, FACS plots 3, 4 and 5 respectively). These IFN- $\gamma$ , TNF- $\alpha$  and IL-5 gates were used to analyze splenocytes stimulated with a pool of synthetic peptides covering the predicted CD8<sup>+</sup> and CD4<sup>+</sup> T-cell epitopes of the SARS-CoV-2 S protein from rMV vaccinated animals, the data of these analyses are presented in Fig.5. FACS plots on the right define quadrant IFN- $\gamma$  and TNF- $\alpha$  gates in CD4<sup>+</sup> and CD8<sup>+</sup> T cells.

# SFig.8

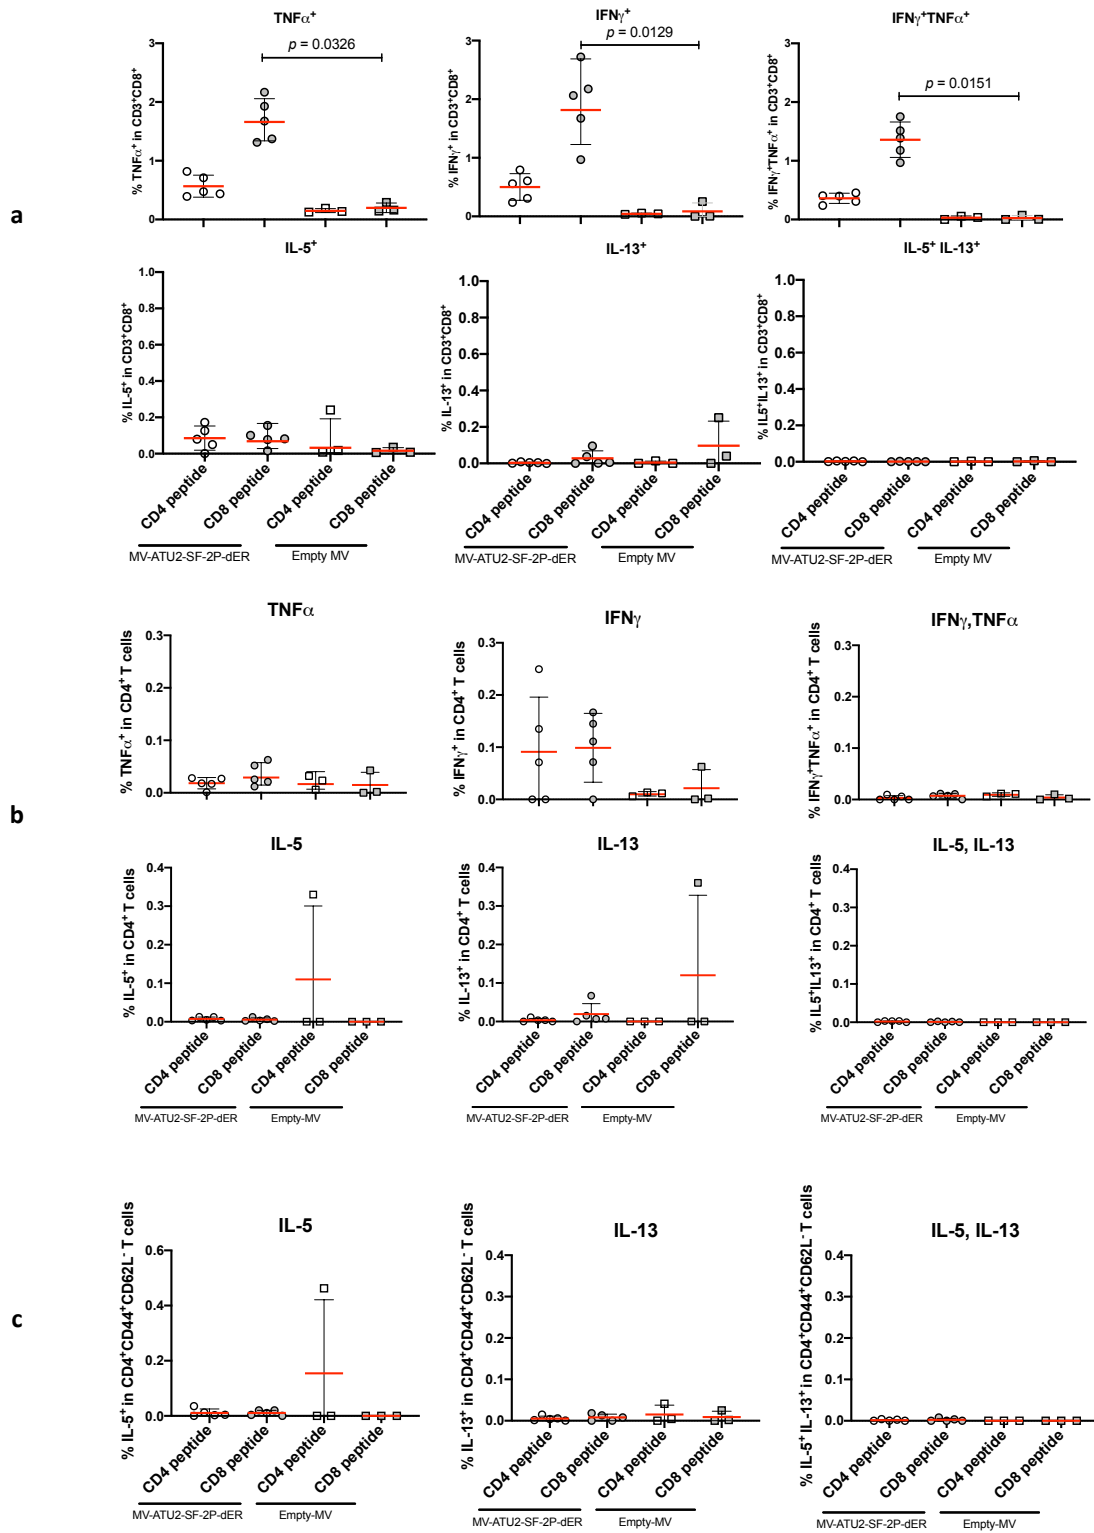

**Supplementary figure 8.** Cytokine expression profile of T cells assessed in IFNAR<sup>-/-</sup> mice (n=5 or n=3 for a control Empty MV group) immunized intraperitoneally (i.p.) with 1x10<sup>5</sup> TCID<sub>50</sub> of MV-ATU2-SF-2P-dER or Empty MV. Splenocytes were stimulated with either S-specific CD4 or CD8 peptide (S. Table1). S-specific **a**) CD8<sup>+</sup> and **b**) CD4<sup>+</sup> T-cells were stained for intracellular IFN $\gamma$ , TNF $\alpha$ , IL-5 and IL13. **c**) S-specific CD4<sup>+</sup> memory T cells were stained for intracellular IL-5 and IL13. Data are presented as geometric mean with lines and error bars indicating  $\pm$  geometric SD. Statistical difference was determined by Kruskal-Wallis one-way ANOVA test with Dunn's multiple comparison test.



## SFig. 9

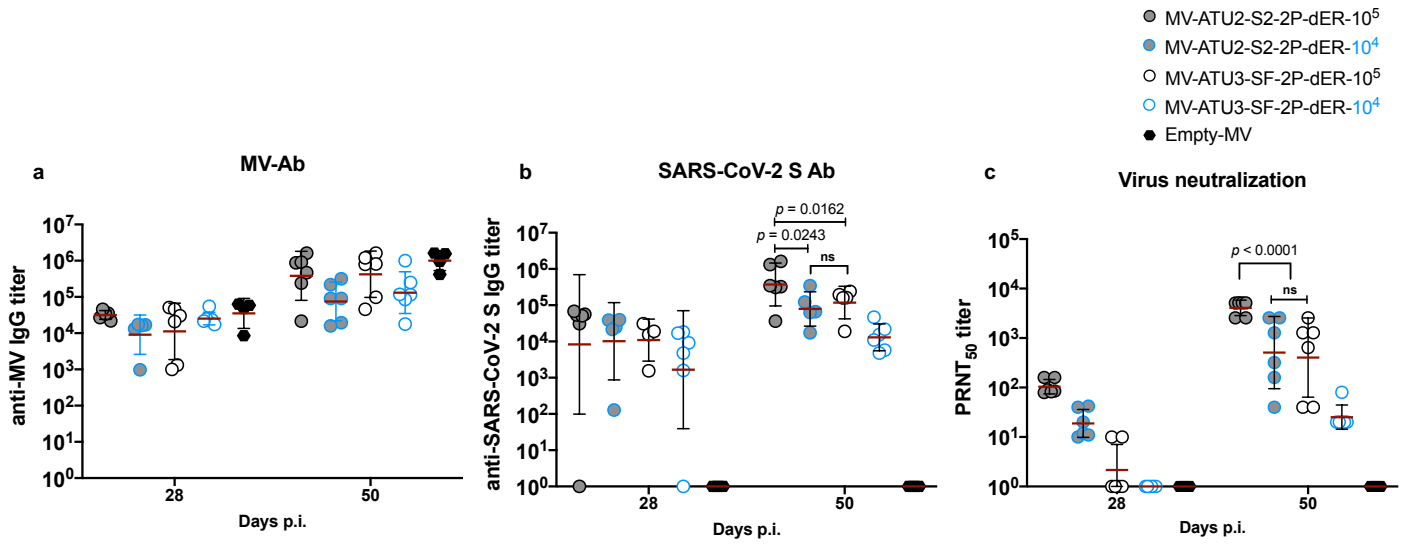

**Supplementary figure 9.** Dose-dependent homologous prime-boost immunization. IFNAR<sup>-/-</sup> mice ( $n=6$  or  $n=4$  for the empty MV control) were immunized intraperitoneally with the indicated rMV vaccine candidates at  $1 \times 10^5$  TCID<sub>50</sub> or  $1 \times 10^4$  TCID<sub>50</sub> at days 0 and 28. Sera were collected 28 and 50 days after immunization and assessed for specific antibody responses to **a)** MV antigen or **b)** SARS-CoV-2 S protein. The data show the reciprocal endpoint dilution titers with each data point represents an individual animal. **c)** Neutralizing antibody response to SARS-CoV-2 virus expressed as 50% plaque reduction neutralization test (PRNT<sub>50</sub>) titers. Data are represented as geometric means with lines and error bars indicating  $\pm$  geometric SD. Significant differences between the groups were determined by the two-tailed Mann-Whitney test.

# SFig. 10

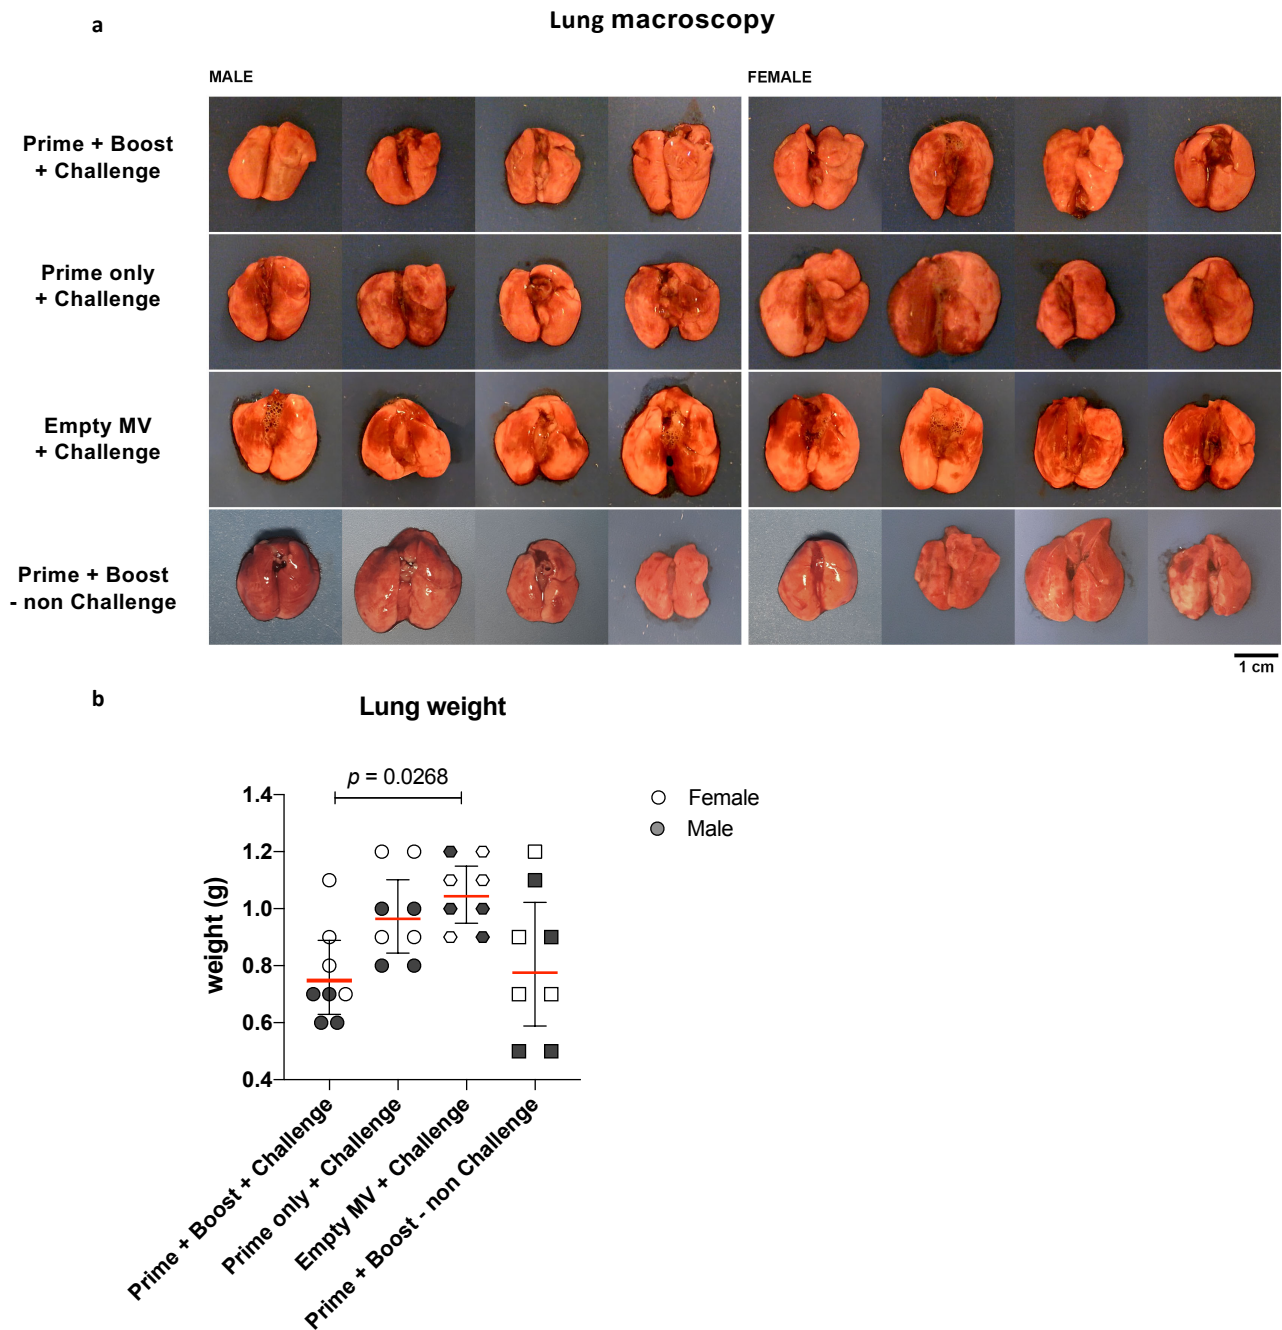

**Supplementary figure 10.** MV-ATU2-SF-2P-dER immunization protects SARS-CoV-2-challenged golden Syrian hamsters from lung pathology. The vaccinated animals were challenged (n=8/group). **a**) representative images of freshly-collected lungs at 4 dpi from immunized and challenged hamsters. Scale bar = 1 cm. **b**). lung weight of the immunized and challenged animals collected at 4 dpi. Data are presented as geometric mean with lines and error bars indicating  $\pm$  geometric SD. Statistical significance was determined by Kruskal-Wallis one-way ANOVA test with Dunn's multiple comparison test.

# SFig. 11

>SF-dER DNA sequence (3792 bp)

```
ATGTTTCGTCTTTCTGGTATTGCTTCCTCTGGTGAGTTCCAGTGCCTGAACCTGACGACTCGGACACAGCTGCCGCTGCATA
CACAAACAGCTTCACACGAGGTGTTTACTATCCGGACAAGGTGTTCCGGTCCCTCTGTCTTGCACAGTACTCAGGACCTTTTTTC
TGCCATTTCTTTAGTAACGTAACATGGTTCCACGCTATCCATGTAAGTGGAAACCAATGGCACCAAGCGCTTCGACAATCCAGTC
CTGCCTTTCAACGATGGCGTCTACTTCGCCTCTACCGAGAAATCAAATATTATTAGAGGGTGGATCTTCGGGACCACCCTTGA
TAGCAAGACTCAGAGTCTTCTGATCGTGAACAATGCTACTAACGTCGTCATAAAAGTATGTGAATTTTCAGTCTGCAATGACC
CCTTCCTGGGCGTGTACTATCACAAAAATAACAAGTCTGGATGGAATCCGAGTTTCGGGTATACAGCAGCGCTAATAACTGT
ACCTTCGAATATGTGAGCCAGCCATTCTGATGGACCTGGAGGGGAAGCAGGGCAACTTCAAAAACCTGAGGGGAATTCGTGTT
CAAGAACATTGACGGATACTTCAAAATCTACAGCAAGCACACTCCAATTAATCTTGTAGGGACCTTCCCTCAGGGGTTCTCCG
CGCTGGAACCCCTGGTGGATCTGCCAATGGTATTAACATCACGAGGTTTCAAACCCTGCTCGCCCTCCACCGGTCATACCTG
ACCCAGGTGATAGTAGTAGTGGCTGGACAGCAGGGGCCGAGCATACTACGTCGGCTACCTCCAGCCCGCACATTCCTGCT
GAAGTATAATGAAAACGGTACTATTACAGATGCTGTGGACTGCGCACTTGATCCATTGTCCGAGACTAAATGCACCTTGAAGT
CTTTTACCCTTGAGAAGGGAATCTATCAGACCAGTAATTTTCAGAGTGAACCCACCGAGAGCATCGTGCATTTCTTAATATT
ACAAACCTGTGCCCTTTTGGCGAGGTGTTAACGCCACTCGCTTCGCGAGCGTGTATGCATGGAACCGAAAAGGATTAGCAA
CTGCGTGGCTGATTATTCAGTCTTTTATAATAGTGCTCTTTTCAGTACGTTCAAATGCTATGGAGTGTCCCAACTAAGCTTA
ACGATCTGTGTTTTACCAACGTGTATGCCGACTCTTTCGTCATCAGGGGCGACGAGGTTAGACAAATTCGCCCCGGACAGACA
GGCAAAATTCGCTGACTACAATTATAAACTGCCAGATGACTTTACAGGATGCGTGATTGCCTGGAACAGCAACAACCTTGATTC
TAAGGTGGGCGGAAACTACAACCTATCTGTACAGGCTGTTCCGCAAATCAAACCTGAAGCCATTTCGAAAGGGACATTTCAACTG
AGATCTACCAGGCCGGATCTACACCTTGCAACGGGGTGGAAAGGATTCAACTGCTACTTCCCGCTCCAGTCAATATGGCTTTCAA
CCTACCAATGGAGTGGGCTACCAACCTTATCGAGTAGTTGTTCTCTCTTTTCGAGTTGTTGCATGCCCCAGCCACTGTCTGCGG
ACCAAAGAAATCCACCAATCTGGTGA AAAACAAGTGGCTCAACTTCAACTTCAATGGACTCACCGGTACAGGGGTTCTTACC
AGTCAAACAAGAAATTCCTTCCGTTTCAGCAGTTTGGACGCGATATCGCCGACACTACGGATGCAGTACGCGATCCTCAGACA
CTTGAGATCCTGGACATCACTCCATGCTCTTTTGGAGGGGTGTCTGTCTACTCCCGGACGAATACCAGTAATCAGGTGCG
CGTGCTCTATCAAGATGTCAACTGCACAGAGTGCAGTCCAGTTCACGCCGATCAGCTTACCCCTACTTGGCGAGTATATA
GCACAGGTTCCAACGTGTTTCAGACAAGGGCGGGTGTCTGATCGGCGCTGAGCAGCTCAATAATAGCTAGCAGTATCATC
CCTATTGGAGCCGGATTTGCGCTAGCTATCAGACTCAGACTAACTCACCCGCGAGCTAGGTCTGTAGCAAGTACAGAGTAT
CATAGCCTATACTATGAGCCTGGGGGAGAAAATCTGTGCTTATAGTAATAACAGTATTGCAATTCCTACTAACTTCACTA
TTAGCGTGACTACAGAAATCTGCCAGTGAGCATGACCAAGACCTCCGTCGACTGTACCATGTATATCTGCGGAGACAGCACA
GAATGCAGCAACCTGCTTCTGCAGTACGGTAGCTTTTGTACCCAGCTGAACAGGGCACTGACCGGCATCGCTGTGGAACAGGA
CAAAAATACGCAGGAGGTGTTTCGCTCAGGTCAAGCAGATTTATAAGACACCCCAATAAAAAGACTTCGGCGGCTTTAACTTCT
CCCAGATCCTGCCCGATCCGTCAAAACCTTCCAAGAGAAGTTTTATCGAGGATCTGCTGTTTAAACAAAGTAACATTGGCTGAT
GCTGGCTTTTATTAACAGTACGGCGATTGCTGCGGAGATATCGCCGCTAGAGATCTGATCTGCGCTCAAAAATTTAATGGCCT
CACTGTATTGCCCCCTGCTGACGGATGAAATGATTGCCAATACACATCAGCCCTGCTGGCTGGGACAATCACTTCCGGCT
GGACGTTCCGGTGTGGAGCTGCTCTTCAAATTCATTTGCCATGCAAATGGCTTATAGATTCAACGGAAATGGCGTGACCCAA
AACGTGCTGTACGAAAATCAAAGCTGATTGCTAATCAGTTTAACTCCGCTATCGGTAAGATACAGGACAGCTGTCTAGTAC
TGCCAGCGCCCTCGGAAAGCTCCAGGATGTGGTGAACCAGAATGCGCAGGCGCTGAACACACTCGTCAAACAGCTTAGCAGCA
ATTTCCGGCGAATTAGCAGTGTACTGAACGACATCTTGTCTCGGCTCGACAAGGTGCGAGGCCGAAGTGCAGATTGATCGCCTG
ATCACTGGCCGGCTCCAGTCTCTGCAGACCTACGTAACCCAGCAACTCATAACGCGCTGCCGAAATTCGGGCTTCAGCTAACCT
GGCCGCAACAAAGATGTCTGAATGTGTTCTTGGGCAGTCCAAGAGGGTGGACTTCTGCGGGAAAGGATATCACCTGATGTCTT
TCCCTCAGAGCGCCCTCATGGAGTGGTGTTCCTTTCATGTTACCTATGTTCCGGCCAGGAAAAGAAATTTTACCCTGCCCA
GCCATTTGCCATGATGGTAAAGCACACTTCCCAAGAGAGGGCGTGTGTTGTTAGTAACGGCACCCACTGGTTCGTTACCCAGCG
CAATTTTTACGAACCTCAAATCATTACCCTGACAATACATTTGTATCAGGCAATTGCGACGTGGTGTATCGGAATCGTAAATA
ATACAGTCTACGATCCCTGCAGCCAGAGCTTGACAGCTTTAAAGAGGAACTGGACAAATACTTCAAAAATCATAACAAGCCCC
GACGTCGACCTGGGAGATATTTCTGGCATCAATGCCTCCGTCGTGAATATCCAAAAGAGATCGACCCGCTTAATGAGGTTGC
CAAAAACCTCAACGAGTCCCTGATTGATCTGCAGGAGCTGGGGAAGTACGAGCAGTATATCAAATGGCCCTGGTACATCTGGC
TGGGCTTCATTGCCGGCTCATAGCCATCGTGATGGTGCAGATCATGCTGTGTTGCATGACCTCTTGTGTTCTTGTCTGAAG
GGGTGCTGCTCTTGTGGGAGTTGTTGTAATTCGATGAGGATGATTCCGAATAATAG
```

**Supplementary figure 11.** DNA sequence of SARS-CoV-2 SF-dER used as the template to construct SARS-CoV-2 vaccine candidates.

## S.Table 1

**Supplementary Table1.** Peptide pools corresponding to the S1 and S2 subunits used to stimulate S-specific CD4<sup>+</sup> or CD8<sup>+</sup> T cells.

| CD4 peptides    | Subunit | Amino acid position |
|-----------------|---------|---------------------|
| QDLFLPFFSNVTWFH | S1      | 52-66               |
| STEIQAGSTPCNGV  | S1      | 469-483             |
| VLSFELLHAPATVCG | S1      | 512-526             |
| ENSVAYSNNSIAIPT | S2      | 702-716             |
| ITSGWTFGAGAALQI | S2      | 882-896             |
| QMAYRFNGIGVTQNV | S2      | 901-915             |
| GKIQDLSSTASALG  | S2      | 932-946             |
| IRAAEIRASANLAAT | S2      | 1013-1027           |
| GYHLMSFPQSAPHGV | S2      | 1046-1060           |
| PAQEKNFTTAPAICH | S2      | 1069-1083           |
|                 |         |                     |
| CD8 peptides    | Subunit | Amino acid position |
| FVFLVLLPL       | S1      | 2-10                |
| VNLTRTQL        | S1      | 16-24               |
| LFLPFFSNV       | S1      | 54-62               |
| SNVTWFHAI       | S1      | 60-68               |
| VTWFHAIHV       | S1      | 62-70               |
| RGWIFGTTL       | S1      | 102-110             |
| FQFCNDPFL       | S1      | 133-141             |
| YSSANNCTF       | S1      | 160-168             |
| VSQPFLMDL       | S1      | 171-179             |
| KIYSKHTPI       | S1      | 202-210             |
| INITRFQTL       | S1      | 233-241             |
| AAAYYVGYL       | S1      | 262-270             |
| VRFPNITNL       | S1      | 327-335             |
| FNATRFASV       | S1      | 342-350             |
| GNYNLYRL        | S1      | 447-455             |
| VGYPYRVV        | S1      | 503-511             |
| VVLSFELL        | S1      | 510-518             |
| VNFNFGLT        | S1      | 539-547             |
| YQDVNCTEV       | S1      | 612-620             |
| SIIAYTMSL       | S2      | 691-699             |
| VAYSNNSIA       | S2      | 705-713             |
| FGGFNFSQI       | S2      | 797-805             |
| AALQIPFAM       | S2      | 892-900             |
| VVNQNAQAL       | S2      | 951-959             |
| VVFLHVTYV       | S2      | 1060-1068           |
| ISGINASVV       | S2      | 1169-1177           |
| IWLGFIAGL       | S2      | 1216-1224           |
| IAIVMVTIM       | S2      | 1225-1233           |

## S.Table 2

**Supplementary Table 2.** Primers used for construction and sequencing of SF-dER, S2-dER and their 2P mutation counterparts along with the primers used for mouse-adapted SARS-CoV-2 vRNA detection.

| Primer name                 | Sequence                                   |
|-----------------------------|--------------------------------------------|
| <b>Construction primers</b> |                                            |
| BsiWI-Signal                | TAACGTACGGCCACCATGTTTCGTCTTTCTGGTATTG      |
| BssHII-SF                   | TAAGCGCGCCTATTATTCGGAATCATCCTCATCGA        |
| BsmBI-signal                | TAACGTCTCCGCACTGGGAACTCACCAGAGGAAG         |
| BsmBI-S2                    | TAACGTCTCAGTGCGTAGCAAGTCAGAGTATCATAG       |
| BssHII-S2                   | TAAGCGCGCTTATTTCGGAATCATCCTCATCGAATTTAC    |
| BsmBI-2P-fwd                | AATCGTCTCACACCAGAGGCCGAAGTGCAGATTGATCGCCTG |
| BsmBI-2P-rev                | ATACGTCTCAGGTGGGTCGAGCCGAGACAAGATGTCGTTC   |
| BsmBI-deltaF-fwd            | AATCGTCTCTCCTCTGTAGCAAGTCAGAGTATCATAG      |
| BsmBI-deltaF-rev            | ATACGTCTCTGAGGGTGAGTTAGTCTGAGTCTGATAG      |
| <b>Sequencing primers</b>   |                                            |
| Signal-fwd1                 | TCTGGTATTGCTTCCTCTGGTG                     |
| SF-fwd2                     | TGCGCACTTGATCCATTGTC                       |
| S2-fwd3                     | GTAAAGCACACTTCCCAAGAG                      |
| SF-fwd4                     | GATCCTGGACATCACTCCATGC                     |
| SF-rev1                     | TTCCAATTACATGGATAGCGTGG                    |
| S2-rev1                     | TACTGTTACTATAAGCGACAG                      |
| S2-rev3                     | GATCTCTAGCGGCGATATCTC                      |
| 3433                        | GACCTTGGGAGGCAATCACT                       |
| oligo8a                     | GGAATCGCTGTCCTCAACAA                       |
| 9119                        | AGATAGGGCTGCTAGTGAACCAAT                   |
| 9218                        | TGGACCCTACGTTTTTCTTAATTCT                  |
| <b>qRT-PCR primers</b>      |                                            |
| <b>MACo3</b>                |                                            |
| nCoV_IP4-14059Fw            | GGTAACTGGTATGATTTTCG                       |
| nCoV_IP4-14146Rv            | CTGGTCAAGGTTAATATAGG                       |
| nCoV_IP4-14084Probe(+)      | TCATACAAACCACGCCAGG [5']Hex [3']BHQ-1 19   |
| <b>SARS-CoV-2</b>           |                                            |
| nCoV_IP2-12669Fw            | ATGAGCTTAGTCCTGTTG                         |
| nCoV_IP2-12759Rv            | CTCCCTTTGTTGTGTTGT                         |
| nCoV_IP2 probe              | AGATGTCTTGTGCTGCCGGTA [5']FAM [3']TAMRA    |
